# Supplementary material for: Hierarchical Co3O4@Ni3S2 electrode materials for energy storage and conversion
Source: Royal Society of Chemistry journal article supplement (doi:10.1039/d1dt04083a), 2022-01-01
Supplement: d1dt04083a1.pdf [file d1dt04083a1.pdf]

## **Hierarchical Co<sub>3</sub>O<sub>4</sub>@Ni<sub>3</sub>S<sub>2</sub> electrode materials for energy storage and conversion**

Jiefei Ding<sup>a</sup>, Depeng Zhao<sup>a</sup>, Tong Xia<sup>a</sup>, Qing Xia<sup>a</sup>, Guanglong Li<sup>a,b,\*</sup>, Yingdong  
Qu<sup>a,b,\*</sup>

<sup>a</sup>School of Materials Science and Engineering, Shenyang University of Technology,  
Shenyang 110870, P. R. China

<sup>b</sup>Key Laboratory of Light Metal Materials and Engineering at Universities of  
Liaoning Province, Shenyang University of Technology, 110870, Shenyang China

\*Correspondences should be addressed: [liguanglong1990@163.com](mailto:liguanglong1990@163.com);

[quyingdong@163.com](mailto:quyingdong@163.com)

Fig S1 CV curves at different scan rates (a)  $\text{Co}_3\text{O}_4$  (b)  $\text{Co}_3\text{O}_4@\text{Ni}_3\text{S}_2-1$  (c)  $\text{Co}_3\text{O}_4@\text{Ni}_3\text{S}_2-5$  GCD curves at different current densities (d)  $\text{Co}_3\text{O}_4$  (e)  $\text{Co}_3\text{O}_4@\text{Ni}_3\text{S}_2-1$  (f)  $\text{Co}_3\text{O}_4@\text{Ni}_3\text{S}_2-5$

Table S1 The electrochemical properties of electrode materials

| Material                                                       | Electrolyte | Specific capacity       | Current density       | Capacity retention    | Ref.      |
|----------------------------------------------------------------|-------------|-------------------------|-----------------------|-----------------------|-----------|
| Co <sub>3</sub> O <sub>4</sub> @Co-MOF                         | 3 M KOH     | 1020 F g <sup>-1</sup>  | 0.5 A g <sup>-1</sup> | 96.7 % (5000 cycles)  | 41        |
| Ni <sub>3</sub> Si <sub>2</sub> /NiOOH/graphen<br>e            | 3 M KOH     | 835.3 C g <sup>-1</sup> | 1 A g <sup>-1</sup>   | 90.7 % (6000 cycles)  | 42        |
| Ni <sub>3</sub> S <sub>2</sub> /Ni <sub>3</sub> N/Ni@NVCN      | 2 M KOH     | 856.3 C g <sup>-1</sup> | 3 A g <sup>-1</sup>   | 83.0 % (4000 cycles)  | 43        |
| C/NiCo <sub>2</sub> S <sub>4</sub>                             | 6 M KOH     | 1545 F g <sup>-1</sup>  | 2 A g <sup>-1</sup>   | 90.1 % (6000 cycles)  | 44        |
| NiCo <sub>2</sub> S <sub>4</sub>                               | 3 M KOH     | 1298 F g <sup>-1</sup>  | 1 A g <sup>-1</sup>   | 90.4 % (8000 cycles)  | 45        |
| Co <sub>3</sub> O <sub>4</sub> @Ni <sub>3</sub> S <sub>2</sub> | 3 M KOH     | 1077 C g <sup>-1</sup>  | 1 A g <sup>-1</sup>   | 86.7 % (10000 cycles) | This work |

Table S2 The electrochemical performance data of as-prepared samples

| Capacity (C g <sup>-1</sup> )<br>Samples                          | Current density (A g <sup>-1</sup> ) |      |     |     |     | Rate performance (%) |
|-------------------------------------------------------------------|--------------------------------------|------|-----|-----|-----|----------------------|
|                                                                   | 1                                    | 2    | 4   | 6   | 10  |                      |
| Co <sub>3</sub> O <sub>4</sub>                                    | 410                                  | 396  | 373 | 357 | 327 | 79.8                 |
| Co <sub>3</sub> O <sub>4</sub> @Ni <sub>3</sub> S <sub>2</sub> -1 | 863                                  | 834  | 797 | 768 | 689 | 79.8                 |
| Co <sub>3</sub> O <sub>4</sub> @Ni <sub>3</sub> S <sub>2</sub> -3 | 1071                                 | 1030 | 985 | 945 | 865 | 80.3                 |
| Co <sub>3</sub> O <sub>4</sub> @Ni <sub>3</sub> S <sub>2</sub> -5 | 734                                  | 677  | 598 | 543 | 449 | 61.2                 |

Fig. S2 Fitting results of Nyquist plots (a)  $\text{Co}_3\text{O}_4$  sample (b)  $\text{Co}_3\text{O}_4@\text{Ni}_3\text{S}_2$ -1 sample (c)  $\text{Co}_3\text{O}_4@\text{Ni}_3\text{S}_2$ -3 sample (d)  $\text{Co}_3\text{O}_4@\text{Ni}_3\text{S}_2$ -5 sample

Fig. S3 (a) XRD before and after cycle (b) SEM after cycle

Table S3 OER properties of electrode materials

| Electrode materials                                            | Overpotential                      | Tafel                      | References |
|----------------------------------------------------------------|------------------------------------|----------------------------|------------|
| Ni <sub>3</sub> S <sub>2</sub> /MnO <sub>2</sub>               | 260 mV (10 mA cm <sup>-2</sup> )   | 61 mV dec <sup>-1</sup>    | 55         |
| Ni <sub>3</sub> S <sub>2</sub> /Ni                             | 310 mV (10 mA cm <sup>-2</sup> )   | 80.1 mV dec <sup>-1</sup>  | 56         |
| Co <sub>3</sub> O <sub>4</sub> /Fe <sub>2</sub> O <sub>3</sub> | 310 mV (10 mA cm <sup>-2</sup> )   | 67 mV dec <sup>-1</sup>    | 57         |
| NiO/CN                                                         | 287 mV (10 mA cm <sup>-2</sup> )   | 58.92 mV dec <sup>-1</sup> | 58         |
| (Fe-Ni)Co <sub>x</sub> -OH/Ni <sub>3</sub> S <sub>2</sub>      | 280 mV (10 mA cm <sup>-2</sup> )   | 75 mV dec <sup>-1</sup>    | 59         |
| Co <sub>3</sub> O <sub>4</sub> @Ni <sub>3</sub> S <sub>2</sub> | 237.6 mV (10 mA cm <sup>-2</sup> ) | 56.78 mV dec <sup>-1</sup> | This work  |
